pretation of clinical observations that may be compatible with brain death (but suggest otherwise) and critical evaluation of the apnea test procedure. These topics can be found in a practice parameter developed by the American Academy of Neurology and approved by its executive board.<sup>3,4</sup> Many hospitals in and outside of the United States have adopted this parameter in its present form, or in a slightly modified form. These parameters are used by neurologists as the guidelines for declaration of brain death.

**Eelco F. M. Wijdicks, M.D.**  
Professor of Neurology  
Department of Neurology  
Mayo Clinic  
Rochester, Minnesota  
wijd@mayo.edu

Anesthesiology  
2000; 92:1204  
© 2000 American Society of Anesthesiologists, Inc.  
Lippincott Williams & Wilkins, Inc.

## Can Brain Death Testing Be Perfect?

*To the Editor:*—I appreciated the excellent review of brain death by Van Norman.<sup>1</sup> However, I must take issue with the implication that well-conducted testing will always correctly indicate whether a patient is dead or alive. As with all complex algorithms, any test sequence for the diagnosis of irreversible brain death may have hidden pitfalls, just as all software of any significant complexity will manifest occasional "bugs." If we accept the notion that, as with all medical tests, testing for brain death has an associated sensitivity and specificity, we must also accept the notion that type I and type II testing errors will inevitably occur. This view is also supported by occasional reports of clinical conditions mimicking brain death.<sup>2,3</sup> Finally, if one accepts the notion that still-living but impaired brain stem nuclei may sometimes recover to a degree, it is possible that some nuclei will wax and wane in function during the test period.

I am curious about what should be done with patients with zero prognosis for survival, but who still do not meet all brain death criteria because some small patch of neurons continues to survive. In most of these cases there is no hope of survival, life support is withdrawn, and somatic death follows promptly. I would suggest, however, that some persons—including myself—would be willing to allow organ retrieval to be performed in such a setting (*i.e.*, a setting of "near-complete" brain death) rather than have the organs go to waste. But if I were to

## References

1. Van Norman GA: A matter of life and death: What every anesthesiologist should know about the medical, legal, and ethical aspects of declaring brain death. *ANESTHESIOLOGY* 1999; 91:275-87
2. Youngner SJ, Landefeld CS, Coulton CJ, Juknialis BW, Leary M: Brain death in organ retrieval. *JAMA* 1989; 261(15):2205-10
3. Wijdicks EFM: Determining brain death in adults. *Neurology* 1995; 45:1003-11
4. Quality Standards Subcommittee of the American Academy of Neurology: Practice parameters for determining brain death in adults (summary statement). *Neurology* 1995; 45:1012-4

(Accepted for publication November 18, 1999.)

construct my living will to allow organ harvesting in this situation, would it be honored?

**D. John Doyle, M.D., Ph.D.**  
Department of Anesthesia  
Toronto General Hospital  
University of Toronto  
Toronto, Ontario  
djdoyle@home.com

## References

1. Van Norman GA: A matter of life and death: What every anesthesiologist should know about the medical, legal, and ethical aspects of declaring brain death. *ANESTHESIOLOGY* 1999; 91:275-87
2. Bakshi N, Maselli RA, Gospe SM Jr, Ellis WG, McDonald C, Maulder RN: Fulminant demyelinating neuropathy mimicking cerebral death. *Muscle Nerve* 1997; 20:1595-7
3. Coad NR, Byrne AJ: Guillain-Barre syndrome mimicking brain-stem death. *Anaesthesia* 1990; 45:456-7

(Accepted for publication November 18, 1999.)

## CORRESPONDENCE

Anesthesiology  
2000; 92:1205-6  
© 2000 American Society of Anesthesiologists, Inc.  
Lippincott Williams & Wilkins, Inc.

*In Reply:*—The author wishes to thank Drs. Wijdicks and Doyle for their thoughts regarding my recent report.<sup>1</sup>

Dr. Wijdicks's 1995 review of brain death determination in adults<sup>2</sup> and the accompanying summary statement practice parameters of the American Academy of Neurology in determining brain death<sup>3</sup> would have made excellent references; however, neither article contradicts or adds substantially to the information regarding medical aspects of brain death declaration, which I directed toward anesthesiologists. Dr. Wijdicks suggests that neurologists and neurosurgeons arguably may be the physicians best qualified to determine brain death. I sympathize with Dr. Wijdicks's discomfort with the suggestion that anesthesiologists have an ethical obligation to review chart data to ascertain that brain death has been documented appropriately before undertaking the care of vital organ donors. Nevertheless, there are compelling problems with any argument that only physicians in the neurologic specialties are, or should be, qualified to determine brain death. The facts do sometimes speak for themselves. An attending neurologist or neurosurgeon was indeed involved in each of the cases that I presented—cases in which obvious errors occurred in the process of determining death. A more detailed description of confirmatory neurologic testing would have been superfluous because in each case it was clinically obvious that the patient simply did not meet brain death criteria.

Several studies have consistently shown the physician's lack of ability to accurately discuss, define, and recognize brain death. For example, a recent study<sup>4</sup> presented to the Society of Critical Care Medicine demonstrated that only 39% of pediatric attending physicians correctly defined brain death, and slightly more than half knew when confirmatory tests were not needed. Neurologists, neonatologists, and other subspecialists were less accurate than pediatric intensivists in correctly defining brain death, interpreting a clinical scenario, and determining whether confirmatory testing was necessary.

Although I stated that "most institutions also require that at least one of the physicians be a neurologist or a neurosurgeon," this requirement clearly does not ensure accuracy in determining brain death, and neuroscience subspecialty training is not necessary to properly educate physicians in brain death determination.

Ninety-nine percent of vital organ donors are declared dead in intensive care units, but hospital location and demographics seriously influence whether neuroscience subspecialists are involved in determining brain death. The Illinois Brain Death Study<sup>5</sup> indicates that primary care physicians were responsible for brain death determination in 28% of cases, whereas critical care specialists were responsible for brain death determinations in only 9% of cases. Furthermore, only 24% of institutions involved neurologists in all brain death determinations. A neurospecialist was most likely to be involved in this determination in hospitals with a neuroscience residency, and was least likely to be involved in rural hospitals or hospitals with small numbers of potentially brain dead patients. Finally, not all hospitals surveyed had protocols for declaring brain death.

The reality in the United States is that many medical specialists of differing education and abilities are involved in declaring brain death. With such physician variability, it becomes the ethical responsibility of any physician, regardless of specialty, who accepts the care of a vital organ donor to review the data by which the determination of death

was made, and to question inconsistencies in test results, regardless of his or her specialty. Anesthesiologists literally may be the last physicians to have an opportunity to examine a brain dead patient, and as "the court of last resort," should be knowledgeable about brain death criteria. It is the important responsibility of every physician to be sure that no living patient is sacrificed to obtain vital organs for another patient.

Dr. Doyle correctly points out that "perfect" brain-death testing is probably not possible; not because we do not have well-defined medical criteria that prospectively and accurately predict brain death, but because the application of diagnostic tests has intrinsic errors. Yet the presence of presumably inalterable, and hopefully low, type I and type II errors in the tests should not serve as an excuse for physicians to be less vigilant correctly applying the tests or interpreting the results. Accepting that a medical test is not perfectly accurate is not equivalent to accepting improper testing conditions or the misinterpretation of test results because of a lack of knowledge.

To Dr. Doyle's question about what to do with patients with "zero prognosis," who do not meet brain death criteria, I would answer that studies have shown that physicians are notoriously inaccurate in predicting time of death for individual patients, and that the patient with zero medical prognosis is difficult to accurately identify, despite persistent physician perceptions to the contrary.<sup>6</sup> Predicting how a patient will want to be cared for as the time of death approaches is even more problematic.

Conflicts of interest between transplant physicians and dying patients, between patients needing expensive end-of-life care and health-care administrators strapped for dollars, and between patients requiring vital organ replacements and dying patients with vital organs to offer are inherent to the transplant process. Without clear guidelines to manage such conflicts, we risk practices that place vulnerable patient populations in peril and that also risk frightening away potential organ donors. Dr. Doyle's altruistic desire to benefit others with the gift of his vital organs before death may make excellent personal sense, yet may represent poor public policy.

#### Gail A. Van Norman, M.D.

Assistant Professor  
Department of Anesthesiology  
Adjunct Assistant Professor  
Department of Internal Medicine  
Faculty Associate  
Department of Biomedical History and Ethics  
University of Washington  
Seattle, Washington  
gvn@u.washington.edu

#### References

1. Van Norman GA: A matter of life and death: What every anesthesiologist should know about the medical, legal, and ethical aspects of declaring brain death. *ANESTHESIOLOGY* 1999; 91:275-87
2. Wijdicks EFM: Determining brain death in adults. *Neurology* 1995; 45:1003-11

3. Quality Standards Subcommittee of the American Academy of Neurology: Practice parameters for determining brain death in adults (summary statement). *Neurology* 1995; 45:1012-4

4. Harrison AM, Botkin JR: Ability of pediatric attendings to define and apply the concept of brain death. *Crit Care Med*. 1999; 27 (suppl 1):A101

5. Schneck JM, Eckhardt R, Burck R: Involvement of health care

providers in the determination of brain death. *Crit Care Med* 1999; 27 (suppl 1):A102

6. Danis M: Improving end-of-life care in the intensive care unit: What's to be learned from outcomes research? *New Horiz* 1998; 6:110-8

(Accepted for publication November 18, 1999.)

Anesthesiology  
2000; 92:1206-7

© 2000 American Society of Anesthesiologists, Inc.  
Lippincott Williams & Wilkins, Inc.

## Malignant Hyperthermia as a Cause for Postoperative Rhabdomyolysis

*To the Editor:*—We read with great interest the article by Dr. Uratsuji concerning a case of rhabdomyolysis after abdominal surgery in the hyperlordotic position.<sup>1</sup> The authors concluded that rhabdomyolysis and the increase of creatine kinase (CK), lactate dehydrogenase, and serum myoglobin were sufficiently explained by lumbar muscle damage. However, malignant hyperthermia (MH) as another possible cause was not ruled out.

First, it is important to know whether this patient was anesthetized before this incident and whether the patient's family members had anesthetic complications or a history of muscle disease. This patient had an elevated CK of 168 U/l at rest, which might be caused by subclinical myopathy. Furthermore, it is well known that MH is characterized by a hypermetabolic response to inhalational anesthetics (e.g., sevoflurane) or depolarizing muscle relaxants, leading to muscle rigidity, metabolic acidosis, hypercapnia, tachycardia, and fever. However, relevant clinical parameters necessary for interpretation of this syndrome, such as temperature, end-tidal carbon dioxide concentration, arterial blood gases, heart rate, and muscle tone (*i.e.*, rigidity or masseter spasm) were not presented. With these clinical parameters, it would be possible to predict the qualitative likelihood of susceptibility to MH using the Clinical Grading Scale (CGS).<sup>2</sup> In this case, the raw-score rank of the CGS has a minimum of 15 points (CK elevation > 10,000 U/l; MH rank 3, which is defined as somewhat less than likely). However, one might speculate that the use of all clinical indicators of the CGS might produce a higher MH rank.<sup>3</sup>

The clinical course of MH is highly variable (e.g., fulminant, moderate, and mild forms) and postoperative rhabdomyolysis may be the only symptom of MH. Although the probability of MH susceptibility in patients with anesthesia-induced rhabdomyolysis is only 0.07,<sup>4</sup> the *in vitro* contracture tests with halothane and caffeine are necessary for diagnosis of MH susceptibility.<sup>5,6</sup> This view is also emphasized in several case reports that present clinical courses of postoperative rhabdomyolysis after the use of volatile anesthetics.<sup>7-9</sup>

We recommend that the qualitative likelihood of susceptibility to MH should be assessed using the CGS in all cases with MH-like symptoms. Furthermore, all patients with clinical suspicion of MH should undergo muscle biopsy for *in vitro* contracture tests, histologic examination, and genetic screening.

**Frank Wappler, M.D.**

Associate Professor

**Marko Fiege, M.D.**

Staff Anesthesiologist

Department of Anesthesiology

University Hospital Eppendorf

Martinistr. 52

Hamburg, Germany

wappler@uke.uni-hamburg.de

## References

1. Uratsuji Y, Ijichi K, Irie J, Sagata K, Nijima K, Kitamura S: Rhabdomyolysis after abdominal surgery in the hyperlordotic position enforced by pneumatic support. *ANESTHESIOLOGY* 1999; 91:310-2
2. Larach MG, Localio AR, Allen GC, Denborough MA, Ellis FR, Gronert GA, Kaplan RF, Muldoon SM, Nelson TE, Ørding H, Rosenberg H, Waud BE, Wedel DJ: A clinical grading scale to predict malignant hyperthermia susceptibility. *ANESTHESIOLOGY* 1994; 80:771-9
3. Richthofen von V, Wappler F, Fiege M, Scholz J: Prediction of malignant hyperthermia susceptibility with the clinical grading scale. *ANESTHESIOLOGY* 1997; 86(suppl):A997
4. Ellis FR, Halsall PJ, Christian AS: Clinical presentation of suspected malignant hyperthermia during anaesthesia in 402 probands. *Anaesthesia* 1990; 45:838-41
5. Larach MG, North American Malignant Hyperthermia Group: Standardization of the caffeine halothane muscle contracture test. *Anesth Analg* 1989; 69:511-5
6. Ørding H, Brancadoro V, Cozzolino S, Ellis FR, Glauber V, Gonano EF, Halsall PJ, Hartung E, Heffron JJA, Heytens L, Kozak-Ribbens G, Kress H, Krivosic-Horber R, Lehmann-Horn F, Mortier W, Nivoche Y, Ranklev-Twetman E, Sigurdson S, Snoeck M, Stieglitz P, Tegazzin V, Urwyler A, Wappler F: In vitro contracture test for diagnosis of malignant hyperthermia following the protocol of the European MH Group: Results of testing patients surviving fulminant MH and un-related low-risk subjects. *Acta Anaesthesiol Scand* 1997; 41:955-66
7. Rubiano R, Chang JL, Carroll J, Sonbolian N, Larson CE: Acute rhabdomyolysis following halothane without succinylcholine. *ANESTHESIOLOGY* 1987; 67:856-7
